# Supplementary material for: Reusable cobalt–copper-catalyzed cross-coupling of (hetero)aryl halides with primary amides under air: investigating a new Co0/CoII-based catalytic cycle
Source: Royal Society of Chemistry journal article supplement (doi:10.1039/d5ob00178a), 2025-01-01
Supplement: d5ob00178a2.pdf [file d5ob00178a2.pdf]

**Table S1**

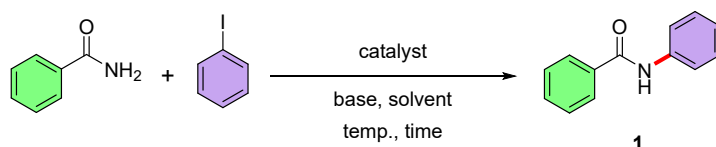

| Entry                   | Catalyst                        | Base                               | Solvent              | Temp.(°C)  | Time       | Yield(%) <sup>b</sup> |
|-------------------------|---------------------------------|------------------------------------|----------------------|------------|------------|-----------------------|
| 1                       | Co(acac) <sub>2</sub> /CuI      | Cs <sub>2</sub> CO <sub>3</sub>    | NMP                  | 110        | 24h        | 86                    |
| 2                       | Co(acac) <sub>2</sub> /CuI      | Cs <sub>2</sub> CO <sub>3</sub>    | DMF                  | 110        | 24h        | 45                    |
| 3                       | Co(acac) <sub>2</sub> /CuI      | Cs <sub>2</sub> CO <sub>3</sub>    | DMSO                 | 110        | 24h        | 76                    |
| 4                       | Co(acac) <sub>2</sub> /CuI      | Cs <sub>2</sub> CO <sub>3</sub>    | THF                  | 90         | 24h        | 72                    |
| 5                       | Co(acac) <sub>2</sub> /CuI      | Cs <sub>2</sub> CO <sub>3</sub>    | PEG-600              | 110        | 24h        | 70                    |
| 6                       | Co(acac) <sub>2</sub> /CuI      | Cs <sub>2</sub> CO <sub>3</sub>    | toluene              | 110        | 24h        | 31                    |
| 7                       | Co(acac) <sub>2</sub> /CuI      | Cs <sub>2</sub> CO <sub>3</sub>    | PhCl                 | 110        | 24h        | 55                    |
| 8                       | Co(acac) <sub>2</sub> /CuI      | Cs <sub>2</sub> CO <sub>3</sub>    | H <sub>2</sub> O     | 110        | 24h        | 40                    |
| 9                       | Co(acac) <sub>2</sub> /CuI      | Cs <sub>2</sub> CO <sub>3</sub>    | NMP+H <sub>2</sub> O | 110        | 24h        | 60                    |
| 10                      | Co(acac) <sub>2</sub> /CuI      | Cs <sub>2</sub> CO <sub>3</sub>    | —                    | 110        | 24h        | 80                    |
| 11 <sup>c</sup>         | Co(acac) <sub>2</sub> /CuI      | Cs <sub>2</sub> CO <sub>3</sub>    | NMP                  | 110        | 24h        | 88                    |
| 12 <sup>c</sup>         | Co(OAc) <sub>2</sub> /CuI       | Cs <sub>2</sub> CO <sub>3</sub>    | NMP                  | 110        | 24h        | 67                    |
| 13 <sup>c</sup>         | CoBr <sub>2</sub> /CuI          | Cs <sub>2</sub> CO <sub>3</sub>    | NMP                  | 110        | 24h        | 43                    |
| 14 <sup>c</sup>         | CoI <sub>2</sub> /CuI           | Cs <sub>2</sub> CO <sub>3</sub>    | NMP                  | 110        | 24h        | 51                    |
| 15 <sup>c</sup>         | Co(acac) <sub>2</sub> /CuI      | K <sub>2</sub> CO <sub>3</sub>     | NMP                  | 110        | 24h        | 90                    |
| 16 <sup>c</sup>         | Co(acac) <sub>2</sub> /CuI      | Na <sub>2</sub> CO <sub>3</sub>    | NMP                  | 110        | 24h        | 70                    |
| 17 <sup>c</sup>         | Co(acac) <sub>2</sub> /CuI      | K <sub>2</sub> CO <sub>3</sub>     | NMP                  | 90         | 24h        | 58                    |
| 18 <sup>c</sup>         | Co(acac) <sub>2</sub> /CuI      | K <sub>2</sub> CO <sub>3</sub>     | NMP                  | 60         | 24h        | 0                     |
| 19 <sup>c</sup>         | Co(acac) <sub>2</sub> /-        | K <sub>2</sub> CO <sub>3</sub>     | NMP                  | 110        | 24h        | 0                     |
| 20 <sup>c</sup>         | -/CuI                           | K <sub>2</sub> CO <sub>3</sub>     | NMP                  | 110        | 24h        | 11                    |
| 21 <sup>c</sup>         | Co(acac) <sub>2</sub> /CuI      | K <sub>2</sub> CO <sub>3</sub>     | NMPH                 | 110        | 15h        | 91                    |
| 22 <sup>c</sup>         | Co(acac) <sub>2</sub> /CuI      | K <sub>2</sub> CO <sub>3</sub>     | NMP                  | 110        | 12h        | 81                    |
| 23 <sup>c,d</sup>       | Co(acac) <sub>2</sub> /CuI      | K <sub>2</sub> CO <sub>3</sub>     | NMP                  | 110        | 15h        | 90                    |
| <b>24<sup>c,e</sup></b> | <b>Co(acac)<sub>2</sub>/CuI</b> | <b>K<sub>2</sub>CO<sub>3</sub></b> | <b>NMP</b>           | <b>110</b> | <b>15h</b> | <b>93</b>             |
| 25 <sup>c,f</sup>       | Co(acac) <sub>2</sub> /CuI      | K <sub>2</sub> CO <sub>3</sub>     | NMP                  | 110        | 15h        | 74                    |
| 26 <sup>c,g</sup>       | Co(acac) <sub>2</sub> /CuI      | K <sub>2</sub> CO <sub>3</sub>     | NMP                  | 110        | 15h        | 87                    |
| 27 <sup>c,h</sup>       | Co(acac) <sub>2</sub> /CuI      | K <sub>2</sub> CO <sub>3</sub>     | NMP                  | 110        | 15h        | 81                    |
| 28 <sup>c,i</sup>       | Co(acac) <sub>2</sub> /CuI      | K <sub>2</sub> CO <sub>3</sub>     | NMPH                 | 110        | 15h        | 72                    |
| 29 <sup>c,j</sup>       | Co(acac) <sub>2</sub> /CuI      | K <sub>2</sub> CO <sub>3</sub>     | NMP                  | 110        | 15h        | 93                    |

<sup>a</sup> Reaction conditions: amide (0.5 mmol), aryl halide (0.5 mmol), Co-catalyst (10 mol%), CuI (10 mol%), base (0.75 mmol), solvent (1 mL) under argon atmosphere. <sup>b</sup> Isolated yields. <sup>c</sup>NMP was used 100  $\mu$ L for 1.0 mmol scale of reaction. <sup>d</sup> Reaction was carried out under nitrogen atmosphere. <sup>e</sup> Reaction was carried out in open air. <sup>f</sup>Co(acac)<sub>2</sub> (5 mol%) and CuI (5 mol%) were used. <sup>g</sup>Co(acac)<sub>2</sub> (5 mol%) and CuI (10 mol%) were used. <sup>h</sup>Co(acac)<sub>2</sub> (10 mol%) and CuI (5 mol%) were used. <sup>i</sup>amide (0.75 mmol), aryl halide (0.5 mmol) were used. <sup>j</sup>amide (0.5 mmol), aryl halide (0.75 mmol) were used.

**Table S2a.**

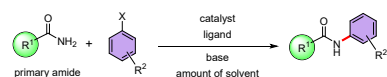

| Entry | R <sup>1</sup>                                                           | X                                            | Catalyst                                                                        | Ligand | Base                                             | Amount of solvent for 1.0 mmol scale of reaction | Yield (%)                                                              | Mechanistic study | Mechanistic cycle | Reusability of catalyst | Substrate scope | Gram-scale synthesis | Conventional work-up required | Ref      |
|-------|--------------------------------------------------------------------------|----------------------------------------------|---------------------------------------------------------------------------------|--------|--------------------------------------------------|--------------------------------------------------|------------------------------------------------------------------------|-------------------|-------------------|-------------------------|-----------------|----------------------|-------------------------------|----------|
| 1     | R <sup>1</sup> = Ph<br>* Aliphatic<br>* Heteroaryl                       | X = I<br>* X = Br, Cl<br>* Heteroaryl        | CoCl <sub>2</sub> ·6H <sub>2</sub> O (20 mol%)                                  | DMEDA  | K <sub>3</sub> PO <sub>4</sub> ·H <sub>2</sub> O | 0.7 mL                                           | 24-28                                                                  | No                | not provided      | No                      | 2               | No                   | Yes                           | 14a      |
| 2     | R <sup>1</sup> = Aryl<br>* Aliphatic<br>* Heteroaryl                     | X = I<br>* X = Br, Cl<br>* Heteroaryl        | Co(C <sub>2</sub> O <sub>4</sub> ) <sub>2</sub> ·2H <sub>2</sub> O (10-20 mol%) | DMEDA  | Cs <sub>2</sub> CO <sub>3</sub>                  | 0.2 mL                                           | 18-92                                                                  | No                | Co(II)/Co(IV)     | No                      | 29              | No                   | Yes                           | 14b      |
| 3     | R <sup>1</sup> = Aliphatic<br>* Aryl<br>* Heteroaryl                     | X = I<br>* X = Br, Cl<br>* Heteroaryl        | Co(C <sub>2</sub> O <sub>4</sub> ) <sub>2</sub> ·2H <sub>2</sub> O (20 mol%)    | DMEDA  | Cs <sub>2</sub> CO <sub>3</sub>                  | 0.2 mL                                           | trace-75                                                               | No                | not provided      | No                      | 16              | No                   | Yes                           | 14c      |
| 4     | R <sup>1</sup> = C <sub>3</sub> H <sub>7</sub><br>* Aryl<br>* Heteroaryl | X = I<br>* X = Br, Cl<br>* Heteroaryl        | Co(acac) <sub>2</sub> (10 mol%)<br>Cul (10 mol%)                                | —      | Cs <sub>2</sub> CO <sub>3</sub>                  | 4.0 mL                                           | 82 (for R <sup>2</sup> = 4-Cl)<br>90 (for R <sup>2</sup> = 1-naphthyl) | No                | Co(I)/Co(III)     | No                      | 2               | No                   | Yes                           | 13e      |
| 5     | R <sup>1</sup> = Aliphatic, Aryl, Heteroaryl                             | X = Br, I, Cl<br>Aryl and Heteroaryl halides | Co(acac) <sub>2</sub> (10 mol%)<br>Cul (10 mol%)                                | —      | K <sub>2</sub> CO <sub>3</sub>                   | 0.1 mL or Solvent-free                           | 43-94 (for X = I, Br)<br>10-80 (for X = Cl)                            | Yes               | Co(0)/Co(II)      | Yes                     | 51              | Yes                  | No                            | Our Work |

"\*" indicates "not applicable", which are significant disadvantages with respect to our present method.

Red colour indicates significant disadvantage with respect to our present method.

Blue colour indicates minor disadvantage with respect to our present method.

**Table S2b.**

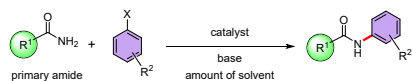

| Entry | R <sup>1</sup>                                                | X                                                      | Catalyst                          | Base                                   | Amount of solvent for 1.0 mmol scale of reaction | Yield (%)                                   | Mechanistic study | Mechanistic cycle                                                                                         | Reusability of catalyst | Substrate scope | Gram-scale synthesis | Conventional work-up required | Ref      |
|-------|---------------------------------------------------------------|--------------------------------------------------------|-----------------------------------|----------------------------------------|--------------------------------------------------|---------------------------------------------|-------------------|-----------------------------------------------------------------------------------------------------------|-------------------------|-----------------|----------------------|-------------------------------|----------|
| 1     | R <sup>1</sup> = CH <sub>3</sub> , Aryl, heteroaryl           | X = I<br>* X = Br, Cl<br>* Heteroaryl                  | Cul                               | K <sub>3</sub> PO <sub>4</sub> or, CsF | 0.4 mL                                           | 39-97                                       | No                | not provided                                                                                              | No                      | 5               | Yes                  | Yes                           | 8a       |
| 2     | R <sup>1</sup> = Pentyl, Ph<br>* Heteroaryl                   | X = I<br>* X = Br, Cl<br>* Heteroaryl                  | CuO NPs                           | Cs <sub>2</sub> CO <sub>3</sub>        | 0.8 mL                                           | 25-88                                       | No                | provided but not mentioned the oxidation state of Cu species either in the text or in the catalytic cycle | Yes                     | 6               | No                   | Yes                           | 8b       |
| 3     | R <sup>1</sup> = CH <sub>3</sub> , Pentyl, Ph<br>* Heteroaryl | X = I<br>* X = Br, Cl<br>* Heteroaryl                  | Cu <sub>2</sub> O NPs             | KOH                                    | 0.7 mL                                           | 70-80                                       | No                | provided but not mentioned the oxidation state of Cu species either in the text or in the catalytic cycle | Yes                     | 9               | No                   | Yes                           | 8c       |
| 4     | R <sup>1</sup> = 4-BrPh, Ph<br>* Aliphatic<br>* Heteroaryl    | X = I<br>* X = Br, Cl<br>* Heteroaryl                  | Cu/Al <sub>2</sub> O <sub>3</sub> | KOH                                    | 2.0 mL                                           | 78-81                                       | No                | not provided                                                                                              | Yes                     | 2               | No                   | Yes                           | 8e       |
| 5     | R <sup>1</sup> = CH <sub>3</sub> , Ph<br>* Heteroaryl         | X = I, Br<br>* X = Cl<br>* Heteroaryl                  | Pre-prepared biogenic CuONP       | K <sub>2</sub> CO <sub>3</sub>         | 3.0 mL                                           | 85-96                                       | Yes               | provided but no redox process shown at the Cu center                                                      | Yes                     | 13              | No                   | Yes                           | 7j       |
| 6     | R <sup>1</sup> = Ph<br>* Aliphatic<br>* Heteroaryl            | X = Br (only bromobenzene)<br>* X = Cl<br>* Heteroaryl | Cul                               | K <sub>3</sub> PO <sub>4</sub>         | 0.5 mL                                           | 49                                          | No                | not provided                                                                                              | No                      | 1               | No                   | Yes                           | 8g       |
| 7     | R <sup>1</sup> = Aliphatic, Aryl, Heteroaryl                  | X = Br, I, Cl<br>Aryl and Heteroaryl halides           | Co(acac) <sub>2</sub> /Cul        | K <sub>2</sub> CO <sub>3</sub>         | 0.1 mL or Solvent-free                           | 43-94 (for X = I, Br)<br>10-80 (for X = Cl) | Yes               | Co(0)/Co(II)                                                                                              | Yes                     | 51              | Yes                  | No                            | Our Work |

"\*" indicates "not applicable", which are significant disadvantages with respect to our present method.

Red colour indicates significant disadvantage with respect to our present method.

Blue colour indicates minor disadvantage with respect to our present method.
